# Supplementary material for: Fabrication of hydrogel microspheres via microfluidics using inverse electron demand Diels–Alder click chemistry-based tetrazine-norbornene for drug delivery and cell encapsulation applications
Source: Royal Society of Chemistry journal article supplement (doi:10.1039/d3bm00292f), 2023-01-01
Supplement: d3bm00292f1.pdf [file d3bm00292f1.pdf]

## Supporting Information

### **Fabrication of hydrogel microspheres via microfluidics using inverse electron demand Diels-Alder click chemistry-based tetrazine-norbornene for drug delivery and cell encapsulation applications**

*Rubén Pareja Tello<sup>1</sup>, Shiqi Wang<sup>1</sup>, Flavia Fontana<sup>1</sup>, Alexandra Correia<sup>1</sup>, Giuseppina Molinaro<sup>1</sup>, Sandra López Cerdà<sup>1</sup>, Sami Hietala<sup>2</sup>, Jouni Hirvonen<sup>1</sup>, Gonçalo Barreto<sup>3,4,5</sup>, Hélder A. Santos<sup>1,6,7,\*</sup>*

<sup>1</sup> Drug Research Program, Division of Pharmaceutical Chemistry and Technology, University of Helsinki, Helsinki FI-00014, Finland

<sup>2</sup> Department of Chemistry, University of Helsinki, Helsinki FI-00014, Finland

<sup>3</sup> Translational Immunology Research Program, Faculty of Medicine, University of Helsinki, PL 4 (Yliopistonkatu 3), 00014, Helsinki, Finland

<sup>4</sup>Orton Orthopedic Hospital, Tenholantie 10, 00280, Helsinki, Finland

<sup>5</sup>Medical Ultrasonics Laboratory (MEDUSA), Department of Neuroscience and Biomedical Engineering, Aalto University, 02150, Espoo, Finland

<sup>6</sup> Department of Biomedical Engineering, University Medical Center Groningen, University of Groningen, Ant. Deusinglaan 1, 9713 AV Groningen, The Netherlands

<sup>7</sup> W.J. Kolff Institute for Biomedical Engineering and Materials Science, University Medical Center Groningen, University of Groningen, Ant. Deusinglaan 1, 9713 AV Groningen, The Netherlands

\*Corresponding author: [h.a.santos@umcg.nl](mailto:h.a.santos@umcg.nl)

## Supporting Information

**Table S1.** Calculated parameters obtained from the analysis of the release studies according to Zero-order, First-order, Higuchi and Korsmeyer-Peppas models.

| Formulation          | Correlation coefficient ( $r^2$ ) |                   |               | Korsmeyer-Peppas model |       |
|----------------------|-----------------------------------|-------------------|---------------|------------------------|-------|
|                      | Zero-order model                  | First-order model | Higuchi model | $r^2$                  | n     |
| 10% PEG-TZ<br>pH 7.5 | 0.954                             | 0.979             | 0.988         | 0.996                  | 0.443 |
| 20% PEG-TZ<br>pH 7.5 | 0.898                             | 0.947             | 0.985         | 0.997                  | 0.194 |
| 10% PEG-TZ<br>pH 5.5 | 0.902                             | 0.958             | 0.980         | 0.991                  | 0.304 |
| 20% PEG-TZ<br>pH 5.5 | 0.913                             | 0.945             | 0.832         | 0.985                  | 0.455 |

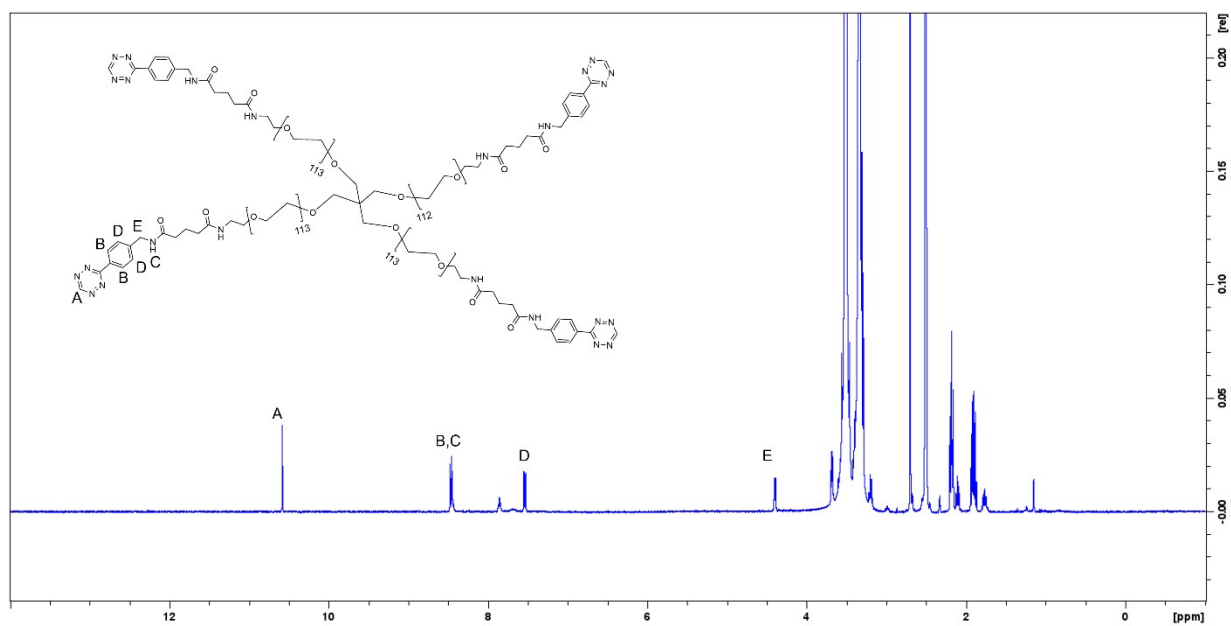

**Figure S1.** <sup>1</sup>H-NMR spectra of 4-arm PEG-TZ

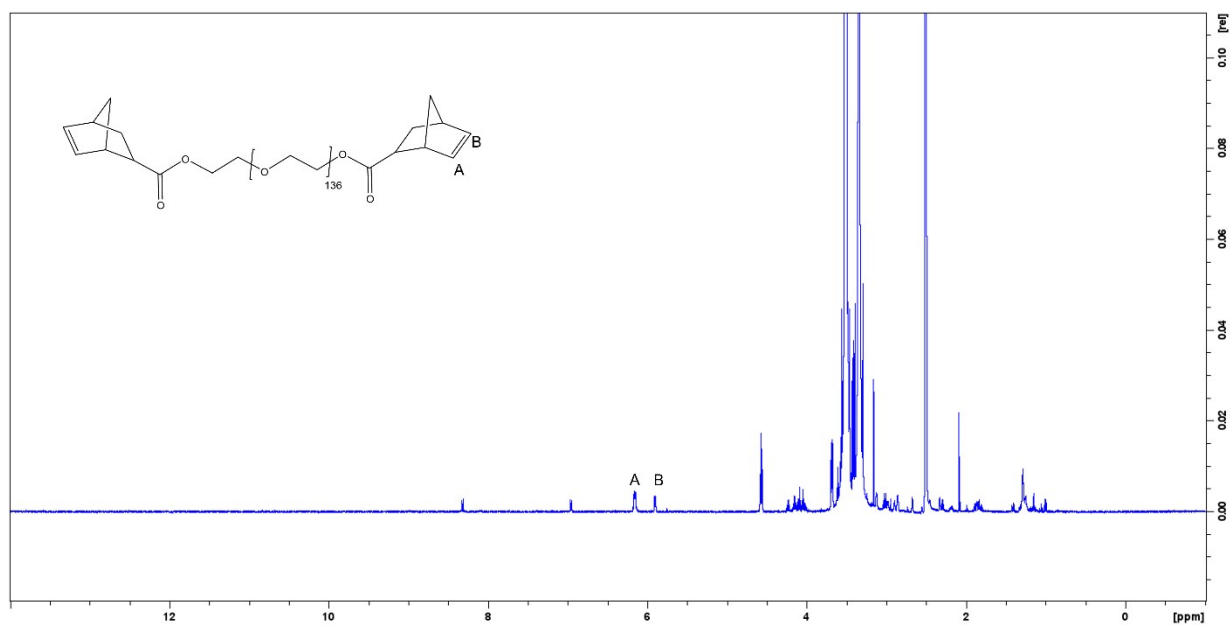

**Figure S2.** <sup>1</sup>H-NMR spectra of 4-arm PEG-NB

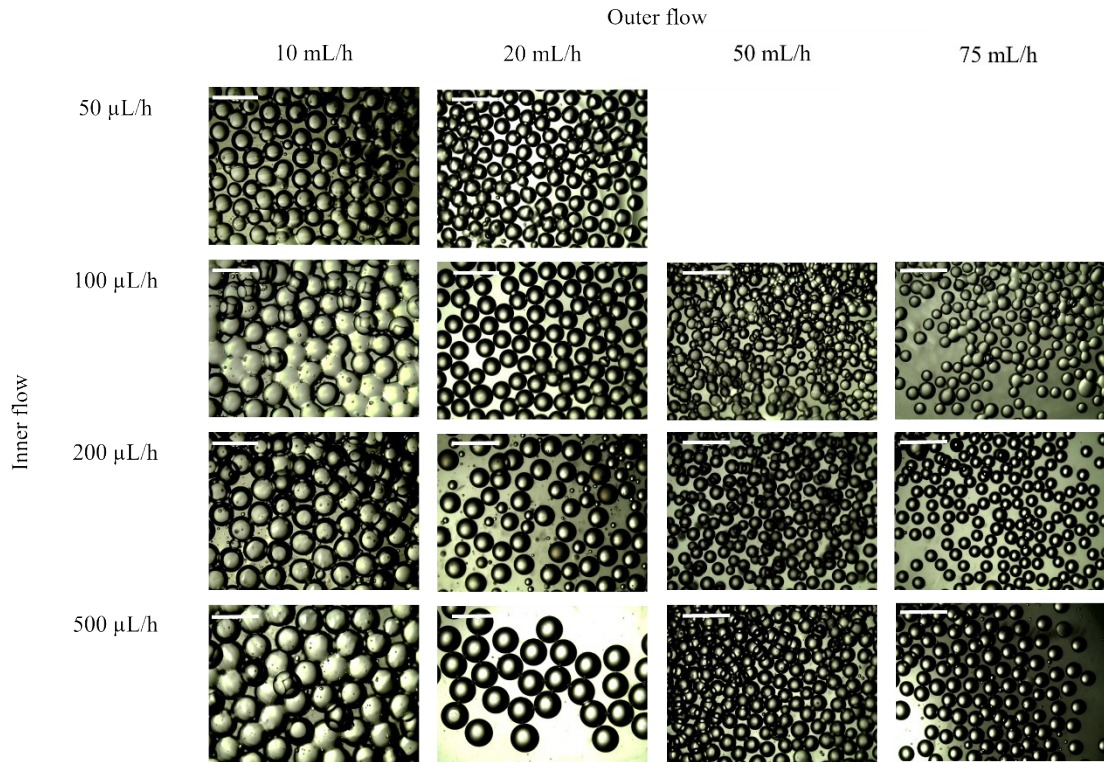

**Figure S3.** Optimization of MPs production based on inner flow values within 50 and 500  $\mu\text{L/h}$  and outer flow values within 10 and 75  $\text{mL/h}$ . Scale bar 1000  $\mu\text{m}$ .

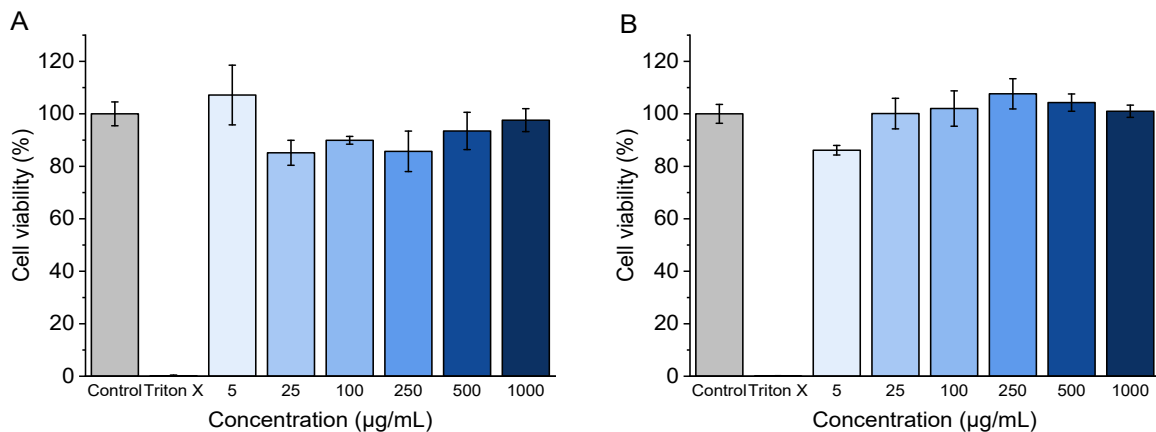

**Figure S4.** Cell proliferation of primary human tenocytes relative to control at the incubation with MPs' concentrations from 5  $\mu\text{g/mL}$  to 1000  $\mu\text{g/mL}$  at time-points of 24 h (A) and 72 h (B). The results were plotted as mean  $\pm$  standard deviation ( $n=3$  biological replicates in which each time three technical replicates have been used). A one-way ANOVA followed by a Turkey-Kramer post hoc test was used for the statistical analysis for comparison with the medium, which was used as a control in all tests. The significance levels of the differences were set at the probabilities of  $*p<0.05$ ,  $**p<0.001$  and  $***p<0.0001$ .

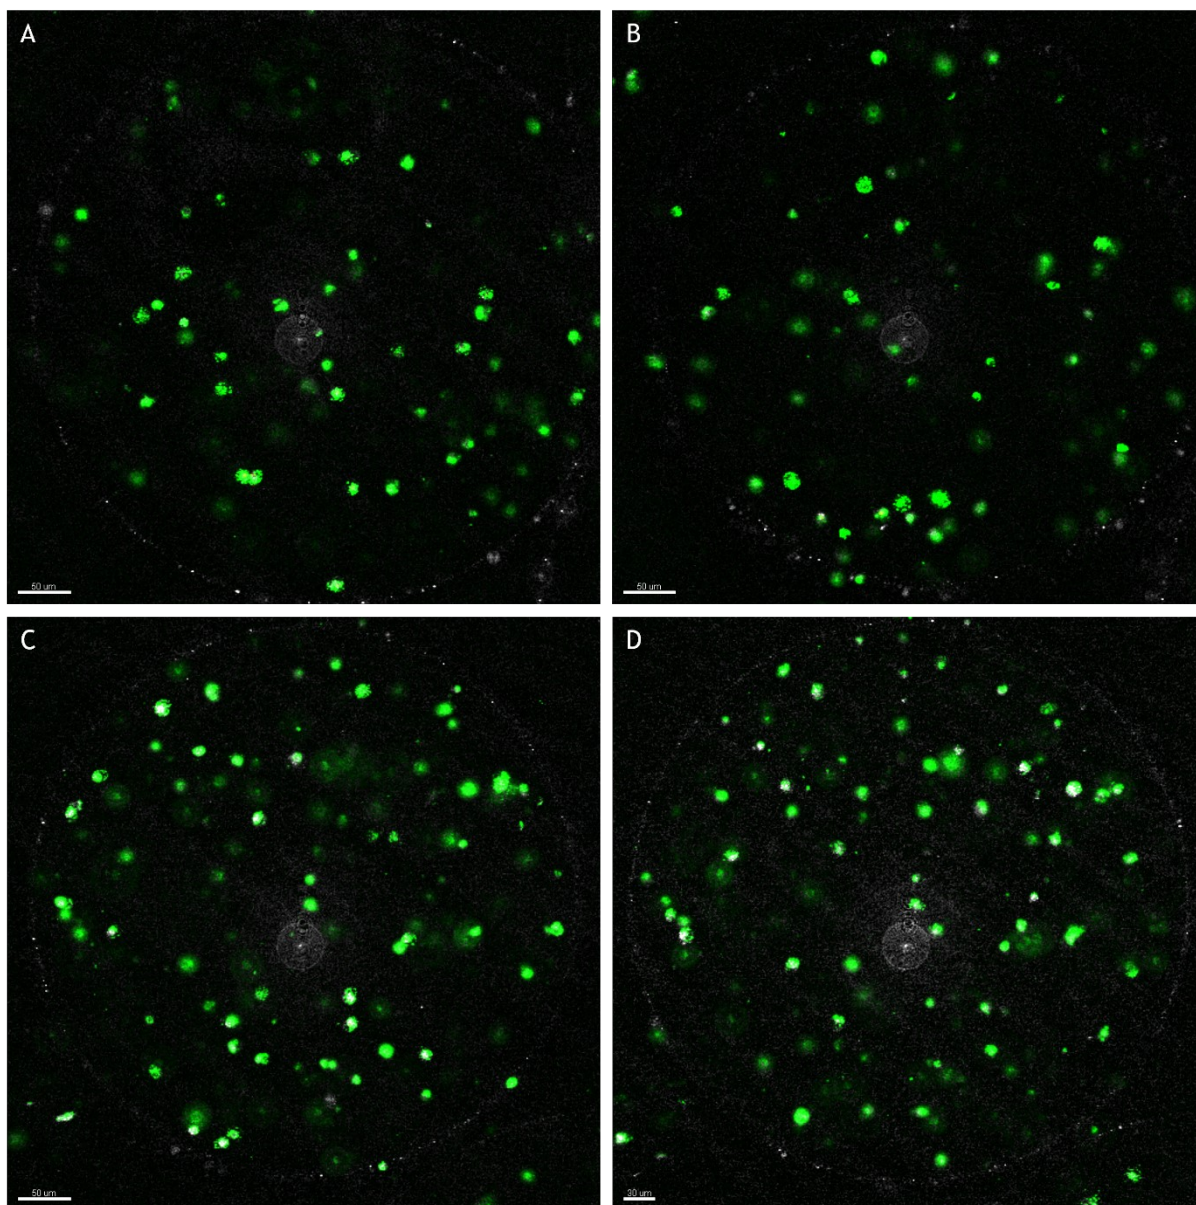

**Figure S5.** Representative Live/Dead z-stack confocal images of RAW cells encapsulated in 10% of PEG-TZ at 37 °C. Overlay of images of green fluorescence (Calcein AM positive cells), red fluorescence (Ethidium homodimer-1 stained cells) and bright field. **(A-B)** 1 day after encapsulation. Scale bar 50  $\mu\text{m}$  **(C-D)** 7 days after encapsulation. Scale bars 50 and 30  $\mu\text{m}$ .
